# Supplementary material for: Determination of the Elution Capacity of Dalbavancin in Bone Cements: New Alternative for the Treatment of Biofilm-Related Peri-Prosthetic Joint Infections Based on an In Vitro Study
Source: MDPI journal article supplement (doi:10.3390/antibiotics11101300), 2022-09-23
Supplement: s1 [file s1]

Figure S1. Preparation of the antibiotic-loaded bone cements

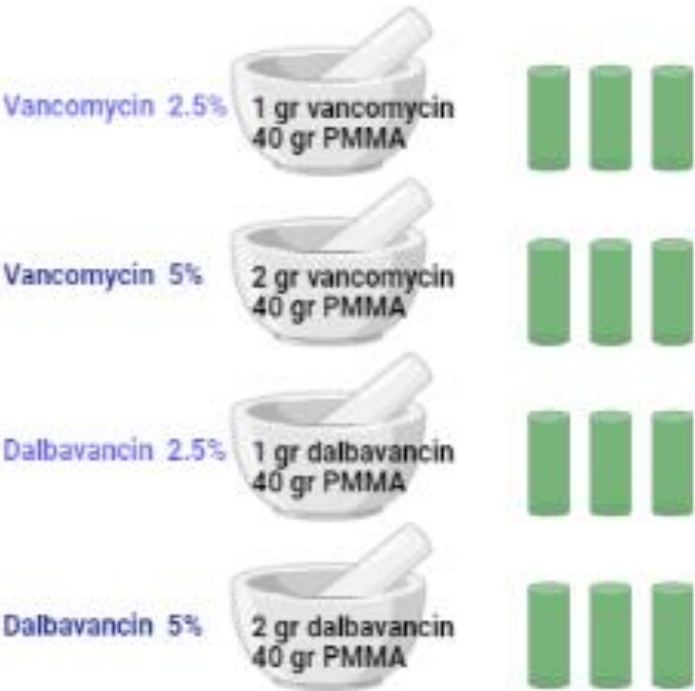

PMMA, Polymethylmethacrylate; gr, grams.

Figure S2. Laboratory procedure

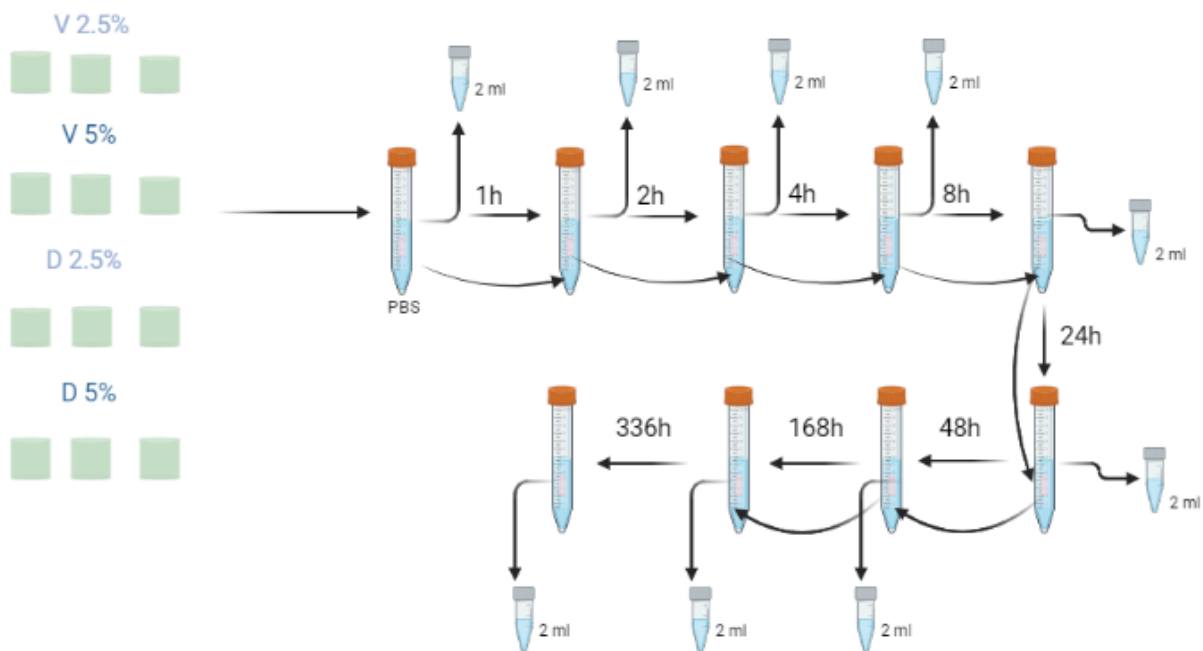

V, vancomycin; D, dalbavancin; h, hours.
